# Supplementary material for: Association of Asymmetric and Symmetric Dimethylarginine with Inflammation in the Population-Based Study of Health in Pomerania
Source: MDPI journal article supplement (doi:10.3390/biom13111612), 2023-11-04
Supplement: s1 [file s1]

SUPPLEMENT

**Table S1.** Associations between arginine or arginine derivate as well as ratios and measured cytokines in the sub population.

| (Log2-transformed)  | Arginine                                      |      | ADMA                          |      | ADMA'         |      | SDMA                          |      | Arginine/ADMA                                 |      | Arginine/ADMA'                   |      | Arginine/SDMA                                 |      | Arginine/SDMA'                                |      |
|---------------------|-----------------------------------------------|------|-------------------------------|------|---------------|------|-------------------------------|------|-----------------------------------------------|------|----------------------------------|------|-----------------------------------------------|------|-----------------------------------------------|------|
|                     | Beta (stderr)                                 | p    | Beta (stderr)                 | p    | Beta (stderr) | p    | Beta (stderr)                 | p    | Beta (stderr)                                 | p    | Beta (stderr)                    | p    | Beta (stderr)                                 | p    | Beta (stderr)                                 | p    |
| APRIL / TNFSF13     | -3.99E <sup>-03</sup> (6.60E <sup>-04</sup> ) | <.01 | 0.056 (0.115)                 | 0.63 |               |      | 0.356 (0.141)                 | 0.01 | -2.05E <sup>-03</sup> (3.50E <sup>-04</sup> ) | <.01 |                                  |      | -1.54E <sup>-03</sup> (2.44E <sup>-04</sup> ) | <.01 |                                               |      |
| BAFF / TNFSF13B     | -1.26E <sup>-03</sup> (7.30E <sup>-04</sup> ) | 0.08 | -0.084 (0.123)                | 0.50 |               |      | 5.63E <sup>-03</sup> (0.151)  | 0.97 | -1.72E <sup>-04</sup> (3.88E <sup>-04</sup> ) | 0.66 |                                  |      | -4.38E <sup>-04</sup> (2.71E <sup>-04</sup> ) | 0.11 |                                               |      |
| Chitinase 3-like 1  | -1.20E <sup>-03</sup> (6.91E <sup>-04</sup> ) | 0.08 | 0.123 (0.116)                 | 0.29 |               |      | 0.160 (0.143)                 | 0.26 | -9.09E <sup>-04</sup> (3.64E <sup>-04</sup> ) | 0.01 |                                  |      | -6.46E <sup>-04</sup> (2.56E <sup>-04</sup> ) | 0.01 |                                               |      |
| gp130 / sIL-6Rbeta  | 1.15E <sup>-04</sup> (9.07E <sup>-04</sup> )  | 0.90 | 0.100 (0.152)                 | 0.51 |               |      | 0.303 (0.187)                 | 0.11 | -3.06E <sup>-04</sup> (4.80E <sup>-04</sup> ) | 0.52 |                                  |      | -4.54E <sup>-04</sup> (3.36E <sup>-04</sup> ) | 0.18 |                                               |      |
| IFN-alpha2          | 6.18E <sup>-05</sup> (7.10E <sup>-04</sup> )  | 0.93 | -0.020 (0.119)                | 0.86 |               |      | -0.212 (0.146)                | 0.15 | 2.58E <sup>-04</sup> (3.75E <sup>-04</sup> )  | 0.49 |                                  |      | 1.91E <sup>-04</sup> (2.63E <sup>-04</sup> )  | 0.47 |                                               |      |
| IFN-beta            | 1.63E <sup>-03</sup> (1.66E <sup>-03</sup> )  | 0.33 | -0.106 (0.284)                | 0.71 |               |      | 0.031 (0.361)                 | 0.93 | 7.98E <sup>-04</sup> (9.47E <sup>-04</sup> )  | 0.40 |                                  |      | 3.47E <sup>-04</sup> (6.27E <sup>-04</sup> )  | 0.58 |                                               |      |
| IFN-gamma           | 1.67E <sup>-04</sup> (8.80E <sup>-04</sup> )  | 0.85 | -0.084 (0.148)                | 0.57 |               |      | -0.248 (0.182)                | 0.17 | 4.20E <sup>-04</sup> (4.65E <sup>-04</sup> )  | 0.37 |                                  |      | 2.85E <sup>-04</sup> (3.27E <sup>-04</sup> )  | 0.38 |                                               |      |
| IL-10               | -1.64E <sup>-04</sup> (4.06E <sup>-04</sup> ) | 0.69 | 0.028 (0.068)                 | 0.68 |               |      | 0.032 (0.084)                 | 0.70 | -6.22E <sup>-05</sup> (2.15E <sup>-04</sup> ) | 0.77 |                                  |      | -3.05E <sup>-05</sup> (1.51E <sup>-04</sup> ) | 0.84 |                                               |      |
| IL-11               | 8.23E <sup>-04</sup> (1.99E <sup>-03</sup> )  | 0.68 | -0.073 (0.328)                | 0.82 |               |      | -0.241 (0.404)                | 0.55 | 8.09E <sup>-04</sup> (1.06E <sup>-03</sup> )  | 0.45 |                                  |      | 2.78E <sup>-04</sup> (7.54E <sup>-04</sup> )  | 0.71 |                                               |      |
| IL-12 (p40)         | 1.69E <sup>-03</sup> (1.05E <sup>-03</sup> )  | 0.11 | 0.020 (0.177)                 | 0.91 |               |      | -0.078 (0.217)                | 0.72 | 8.36E <sup>-04</sup> (5.56E <sup>-04</sup> )  | 0.13 |                                  |      | 4.37E <sup>-04</sup> (3.90E <sup>-04</sup> )  | 0.26 |                                               |      |
| IL-19               | 1.08E <sup>-03</sup> (5.26E <sup>-04</sup> )  | 0.04 | 0.099 (0.089)                 | 0.27 |               |      | 0.014 (0.109)                 | 0.90 | 2.45E <sup>-04</sup> (2.80E <sup>-04</sup> )  | 0.38 |                                  |      | 2.68E <sup>-04</sup> (1.96E <sup>-04</sup> )  | 0.17 |                                               |      |
| IL-22               | 9.79E <sup>-04</sup> (9.03E <sup>-04</sup> )  | 0.28 | 0.100 (0.152)                 | 0.51 |               |      | -0.155 (0.187)                | 0.41 | 3.59E <sup>-04</sup> (4.78E <sup>-04</sup> )  | 0.45 |                                  |      | 5.15E <sup>-04</sup> (3.35E <sup>-04</sup> )  | 0.12 |                                               |      |
| IL-26               | 2.76E <sup>-04</sup> (5.04E <sup>-04</sup> )  | 0.58 | 0.024 (0.085)                 | 0.78 |               |      | 0.119 (0.104)                 | 0.25 | 1.80E <sup>-04</sup> (2.66E <sup>-04</sup> )  | 0.50 |                                  |      | -2.41E <sup>-05</sup> (1.87E <sup>-04</sup> ) | 0.90 |                                               |      |
| IL-29 / IFN-lambda1 | -7.01E <sup>-04</sup> (1.06E <sup>-03</sup> ) | 0.51 | -3.88E <sup>-03</sup> (0.177) | 0.98 |               |      | 0.021 (0.218)                 | 0.92 | -4.20E <sup>-04</sup> (5.58E <sup>-04</sup> ) | 0.45 |                                  |      | -3.66E <sup>-04</sup> (3.91E <sup>-04</sup> ) | 0.35 |                                               |      |
| IL-32               | 3.08E <sup>-03</sup> (1.93E <sup>-03</sup> )  | 0.11 | 0.246 (0.330)                 | 0.46 |               |      | -7.54E <sup>-03</sup> (0.411) | 0.99 | 1.06E <sup>-03</sup> (1.02E <sup>-03</sup> )  | 0.30 |                                  |      | 8.18E <sup>-04</sup> (7.33E <sup>-04</sup> )  | 0.27 |                                               |      |
| IL-34               | 3.88E <sup>-03</sup> (1.43E <sup>-03</sup> )  | <.01 | 0.228 (0.242)                 | 0.35 |               |      | -8.19E <sup>-03</sup> (0.300) | 0.98 | 1.33E <sup>-03</sup> (7.59E <sup>-04</sup> )  | 0.08 |                                  |      | 3.94E <sup>-03</sup> (1.36E <sup>-03</sup> )  | <.01 | -6.55E <sup>-08</sup> (2.65E <sup>-08</sup> ) | 0.01 |
| IL-35               | 9.73E <sup>-04</sup> (8.54E <sup>-04</sup> )  | 0.26 | 0.072 (0.144)                 | 0.62 |               |      | 0.052 (0.177)                 | 0.77 | 4.87E <sup>-04</sup> (4.52E <sup>-04</sup> )  | 0.28 |                                  |      | 1.72E <sup>-04</sup> (3.17E <sup>-04</sup> )  | 0.59 |                                               |      |
| IL-8                | 8.63E <sup>-04</sup> (8.18E <sup>-04</sup> )  | 0.29 | 0.153 (0.137)                 | 0.27 |               |      | 0.122 (0.169)                 | 0.47 | 1.08E <sup>-04</sup> (4.33E <sup>-04</sup> )  | 0.80 |                                  |      | 9.52E <sup>-05</sup> (3.04E <sup>-04</sup> )  | 0.75 |                                               |      |
| LIGHT / TNFSF14     | 7.32E <sup>-04</sup> (1.96E <sup>-03</sup> )  | 0.71 | 0.427 (0.330)                 | 0.20 |               |      | 0.101 (0.407)                 | 0.80 | -9.60E <sup>-04</sup> (1.06E <sup>-03</sup> ) | 0.36 |                                  |      | 9.44E <sup>-05</sup> (7.32E <sup>-04</sup> )  | 0.90 |                                               |      |
| MMP-1               | -1.01E <sup>-03</sup> (1.13E <sup>-03</sup> ) | 0.37 | -0.428 (0.192)                | 0.03 |               |      | -0.305 (0.243)                | 0.21 | 6.64E <sup>-04</sup> (6.14E <sup>-04</sup> )  | 0.28 |                                  |      | 2.18E <sup>-03</sup> (1.07E <sup>-03</sup> )  | 0.04 | -4.72E <sup>-08</sup> (2.09E <sup>-08</sup> ) | 0.02 |
| MMP-2               | 3.97E <sup>-04</sup> (8.39E <sup>-04</sup> )  | 0.64 | -0.033 (0.141)                | 0.81 |               |      | 0.086 (0.173)                 | 0.62 | 3.38E <sup>-04</sup> (4.44E <sup>-04</sup> )  | 0.45 |                                  |      | -1.84E <sup>-04</sup> (3.11E <sup>-04</sup> ) | 0.56 |                                               |      |
| MMP-3               | 1.18E <sup>-03</sup> (9.98E <sup>-04</sup> )  | 0.24 | 0.096 (0.168)                 | 0.57 |               |      | 0.566 (0.205)                 | <.01 | 6.30E <sup>-04</sup> (5.28E <sup>-04</sup> )  | 0.23 |                                  |      | -4.82E <sup>-04</sup> (3.70E <sup>-04</sup> ) | 0.19 |                                               |      |
| Osteocalcin         | -2.34E <sup>-03</sup> (8.27E <sup>-04</sup> ) | <.01 | 0.400 (0.139)                 | <.01 |               |      | 0.548 (0.171)                 | <.01 | -2.10E <sup>-03</sup> (4.30E <sup>-04</sup> ) | <.01 |                                  |      | -1.38E <sup>-03</sup> (3.03E <sup>-04</sup> ) | <.01 |                                               |      |
| Osteopontin (OPN)   | 1.90E <sup>-03</sup> (1.03E <sup>-03</sup> )  | 0.06 | 0.226 (0.173)                 | 0.19 |               |      | 0.318 (0.213)                 | 0.14 | 3.86E <sup>-04</sup> (5.46E <sup>-04</sup> )  | 0.48 |                                  |      | 1.07E <sup>-04</sup> (3.83E <sup>-04</sup> )  | 0.78 |                                               |      |
| Pentraxin-3         | 9.61E <sup>-04</sup> (1.24E <sup>-03</sup> )  | 0.44 | 0.117 (0.208)                 | 0.57 |               |      | 0.494 (0.254)                 | 0.05 | 1.80E <sup>-05</sup> (6.54E <sup>-04</sup> )  | 0.98 |                                  |      | -6.94E <sup>-04</sup> (4.58E <sup>-04</sup> ) | 0.13 |                                               |      |
| sCD163              | 3.16E <sup>-04</sup> (1.03E <sup>-03</sup> )  | 0.76 | 1.15 (0.406)                  | <.01 | -3.90 (1.88)  | 0.04 | 0.358 (0.211)                 | 0.09 | -1.09E <sup>-03</sup> (5.41E <sup>-04</sup> ) | 0.04 |                                  |      | -4.22E <sup>-04</sup> (3.80E <sup>-04</sup> ) | 0.27 |                                               |      |
| sCD30 / TNFRSF8     | 1.12E <sup>-03</sup> (1.13E <sup>-03</sup> )  | 0.32 | 1.32 (0.448)                  | <.01 | -5.53 (2.08)  | <.01 | 0.825 (0.231)                 | <.01 | -5.23E <sup>-04</sup> (5.98E <sup>-04</sup> ) | 0.38 |                                  |      | -9.28E <sup>-04</sup> (4.18E <sup>-04</sup> ) | 0.03 |                                               |      |
| sTNF-R1             | 7.44E <sup>-05</sup> (1.09E <sup>-03</sup> )  | 0.95 | 0.243 (0.183)                 | 0.19 |               |      | 0.933 (0.221)                 | <.01 | -5.44E <sup>-04</sup> (5.76E <sup>-04</sup> ) | 0.35 |                                  |      | -3.23E <sup>-03</sup> (1.01E <sup>-03</sup> ) | <.01 | 4.58E <sup>-08</sup> (1.99E <sup>-08</sup> )  | 0.02 |
| sTNF-R2             | -8.99E <sup>-04</sup> (1.03E <sup>-03</sup> ) | 0.38 | 0.362 (0.172)                 | 0.04 |               |      | 0.882 (0.209)                 | <.01 | -1.49E <sup>-03</sup> (5.41E <sup>-04</sup> ) | <.01 |                                  |      | -1.51E <sup>-03</sup> (3.76E <sup>-04</sup> ) | <.01 |                                               |      |
| TSLP                | 9.85E <sup>-04</sup> (9.48E <sup>-04</sup> )  | 0.30 | -0.175 (0.159)                | 0.27 |               |      | -0.196 (0.196)                | 0.32 | 1.06E <sup>-03</sup> (5.00E <sup>-04</sup> )  | 0.03 |                                  |      | 4.37E <sup>-04</sup> (3.52E <sup>-04</sup> )  | 0.22 |                                               |      |
| TWEAK / TNFSF12     | -8.18E <sup>-04</sup> (6.25E <sup>-04</sup> ) | 0.19 | 0.177 (0.105)                 | 0.09 |               |      | 0.042 (0.129)                 | 0.75 | -2.66E <sup>-03</sup> (8.40E <sup>-04</sup> ) | <.01 | 1.05E-07 (4.02E <sup>-08</sup> ) | <.01 | -3.11E <sup>-04</sup> (2.32E <sup>-04</sup> ) | 0.18 |                                               |      |

ADMA, asymmetric dimethylarginine; SDMA, symmetric dimethylarginine; Stderr, standard error. ADMA', Arginine/ADMA' and Arginine/SDMA' represent spline components (more details see method section). Linear regression were adjusted for age, sex, waist circumference, smoking, total cholesterol and hypertension.

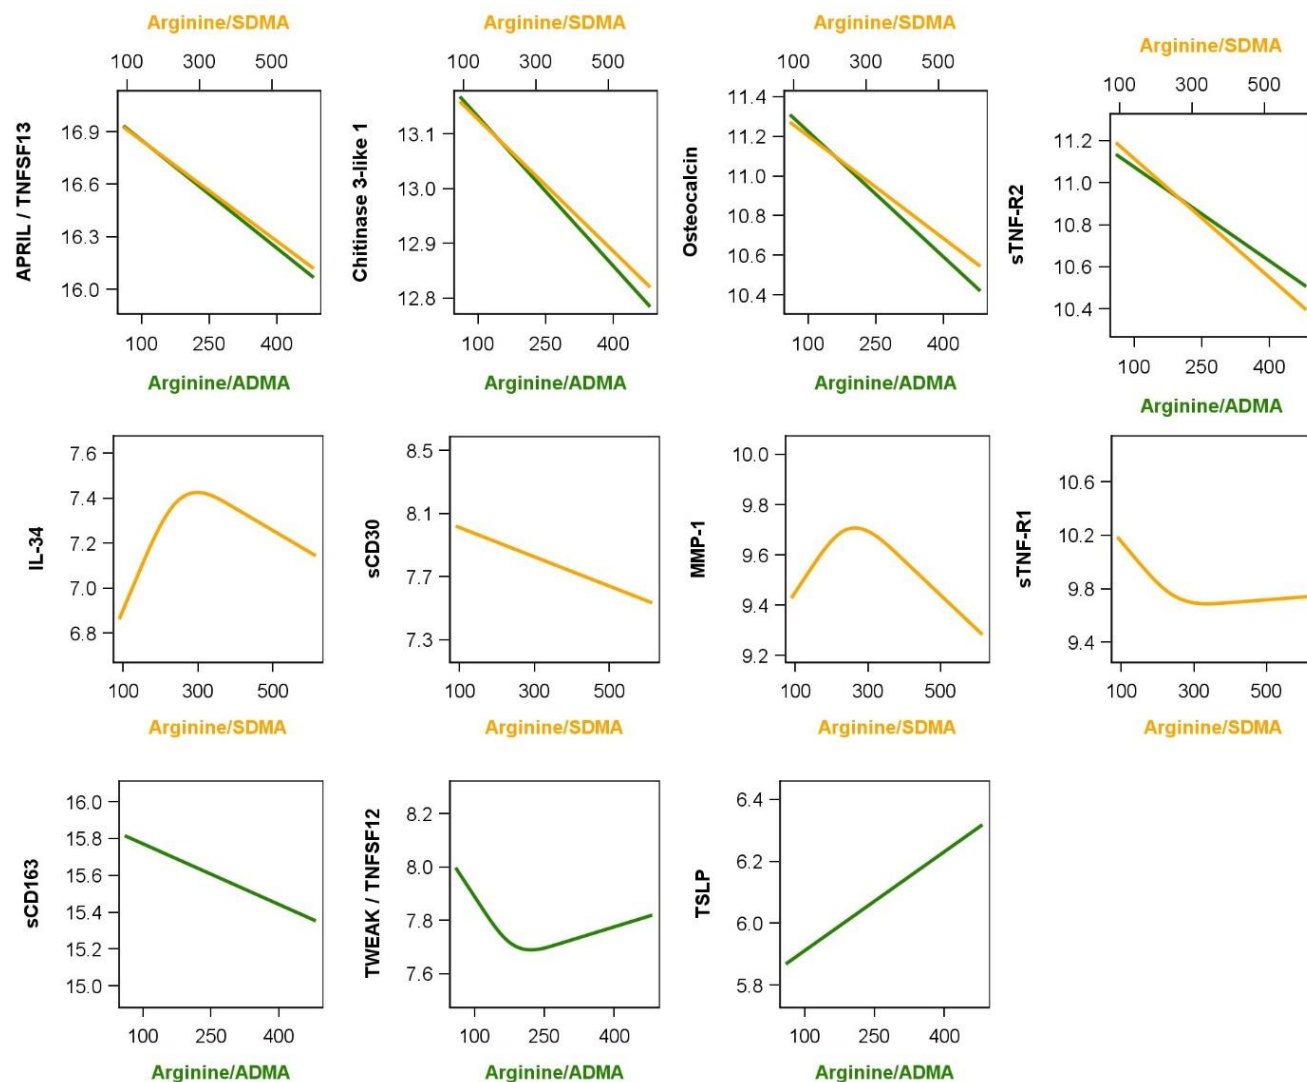

**Figure S1.** Significant associations between arginine/asymmetric (ADMA - green) or arginine/symmetric (SDMA - orange) dimethylarginine ratio and levels of measured cytokines and inflammatory biomarkers in the subpopulation. Shown are regression lines based on linear regression adjusted for age, sex, waist circumference, smoking, total cholesterol and hypertension.
